# Supplementary material for: Recovering a lost seismic disaster. The destruction of El Castillejo and the discovery of the earliest historic earthquake affecting the Granada region (Spain)
Source: PubMed Central journal article supplement (PMC11023601; doi:10.1371/journal.pone.0300549), 2024-04-17
Supplement: pone.0300549.s002.pdf [file pone.0300549.s002.pdf]

*RADIOCARBON DATING CERTIFICATE*

20 February 2019

**Laboratory Code** SUERC-84641 (GU50187)

**Submitter** Paolo Forlin  
University of Durham  
Department of Archaeology  
South Road  
DH1 3LE  
Durham

**Site Reference** GR-EC18

**Context Reference** 207

**Sample Reference** C14-01

**Material** Charcoal : Pinus sp.

**$\delta^{13}\text{C}$  relative to VPDB** -25.3 ‰

**Radiocarbon Age BP** 782  $\pm$  34

**N.B.** The above  $^{14}\text{C}$  age is quoted in conventional years BP (before 1950 AD) and requires calibration to the calendar timescale. The error, expressed at the one sigma level of confidence, includes components from the counting statistics on the sample, modern reference standard and blank and the random machine error.

Samples with a SUERC coding are measured at the Scottish Universities Environmental Research Centre AMS Laboratory and should be quoted as such in any reports within the scientific literature. The laboratory GU coding should also be given in parentheses after the SUERC code.

Detailed descriptions of the methods employed by the SUERC Radiocarbon Laboratory can be found in Dunbar et al. (2016) *Radiocarbon* 58(1) pp.9-23.

For any queries relating to this certificate, the laboratory can be contacted at [suerc-c14lab@glasgow.ac.uk](mailto:suerc-c14lab@glasgow.ac.uk).

Conventional age and calibration age ranges calculated by :



Checked and signed off by :



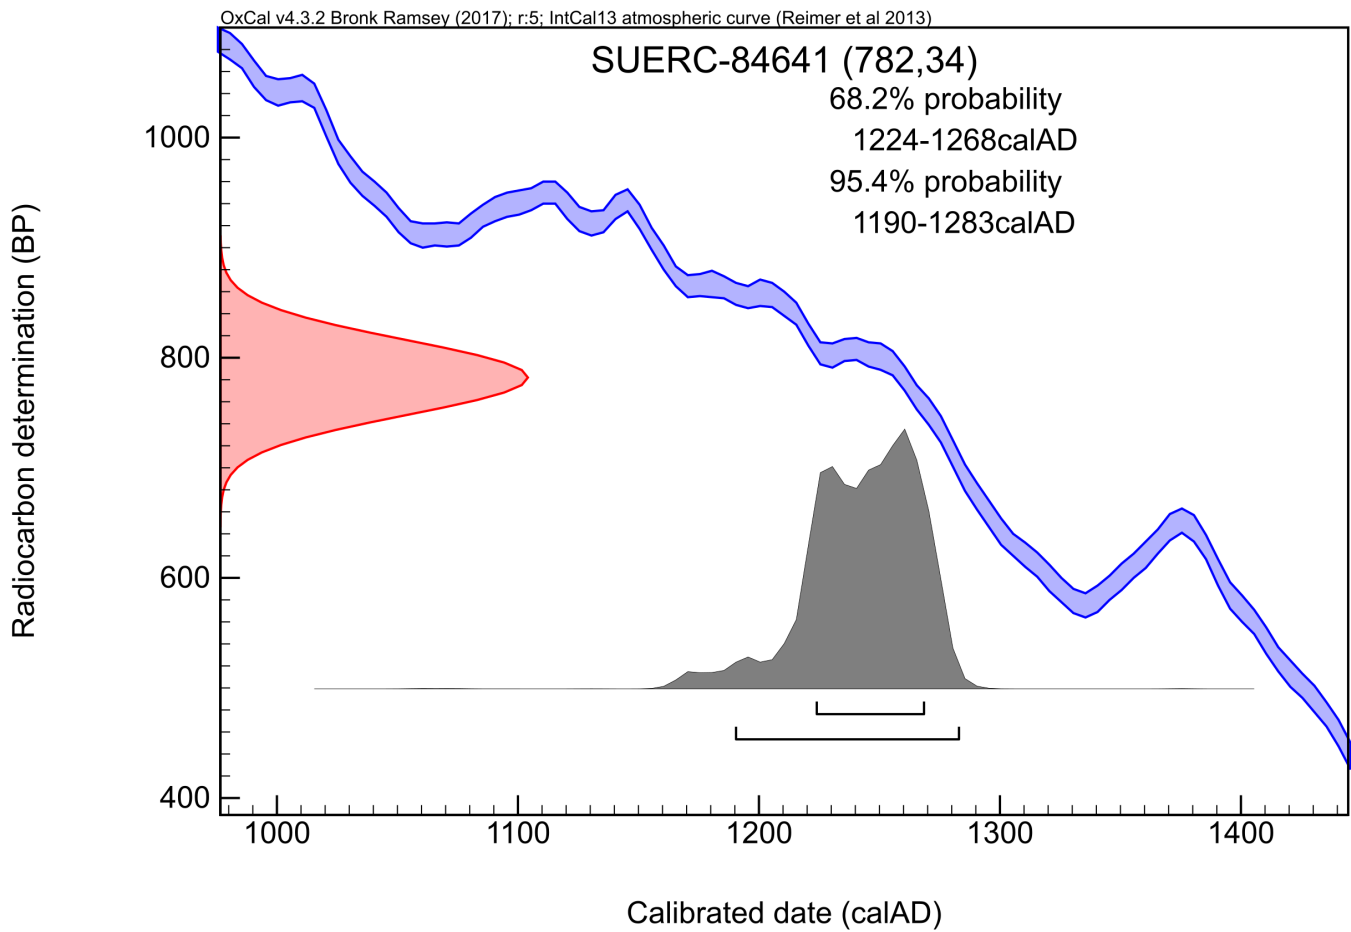

The radiocarbon age given overleaf is calibrated to the calendar timescale using the Oxford Radiocarbon Accelerator Unit calibration program OxCal 4.\*

The above date ranges have been calibrated using the IntCal13 atmospheric calibration curve†

Please contact the laboratory if you wish to discuss this further.

\* Bronk Ramsey (2009) *Radiocarbon* 51(1) pp.337-60

† Reimer et al. (2013) *Radiocarbon* 55(4) pp.1869-87

*RADIOCARBON DATING CERTIFICATE*

20 February 2019

**Laboratory Code** SUERC-84642 (GU50188)

**Submitter** Paolo Forlin  
University of Durham  
Department of Archaeology  
South Road  
DH1 3LE  
Durham

**Site Reference** GR-EC18

**Context Reference** 207

**Sample Reference** C14-02

**Material** Charcoal : Pinus sp.

**$\delta^{13}\text{C}$  relative to VPDB** -25.0 ‰

**Radiocarbon Age BP** 800  $\pm$  34

**N.B.** The above  $^{14}\text{C}$  age is quoted in conventional years BP (before 1950 AD) and requires calibration to the calendar timescale. The error, expressed at the one sigma level of confidence, includes components from the counting statistics on the sample, modern reference standard and blank and the random machine error.

Samples with a SUERC coding are measured at the Scottish Universities Environmental Research Centre AMS Laboratory and should be quoted as such in any reports within the scientific literature. The laboratory GU coding should also be given in parentheses after the SUERC code.

Detailed descriptions of the methods employed by the SUERC Radiocarbon Laboratory can be found in Dunbar et al. (2016) *Radiocarbon* 58(1) pp.9-23.

For any queries relating to this certificate, the laboratory can be contacted at [suerc-c14lab@glasgow.ac.uk](mailto:suerc-c14lab@glasgow.ac.uk).

Conventional age and calibration age ranges calculated by :



Checked and signed off by :



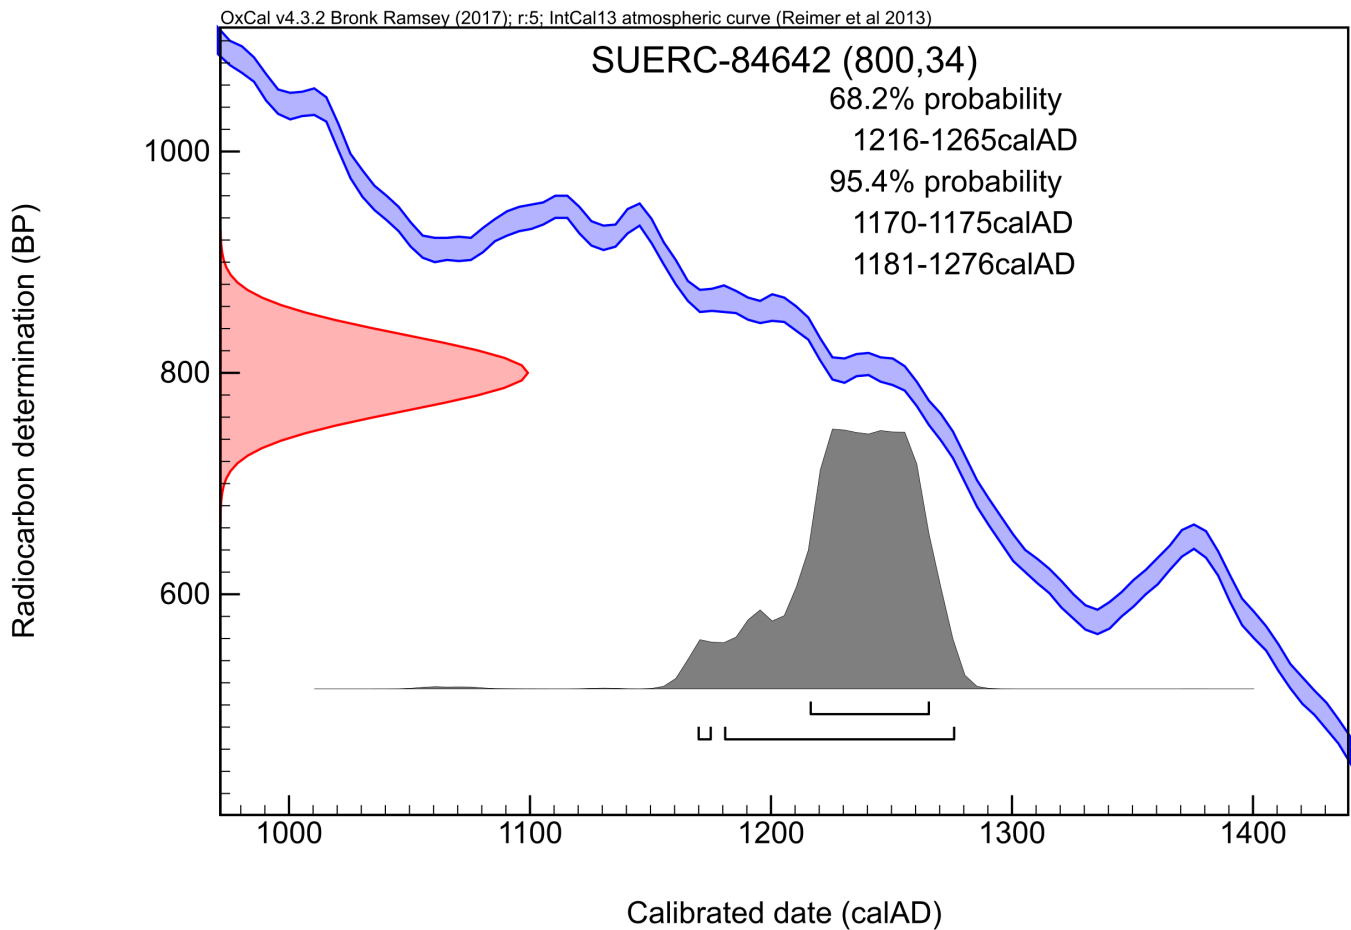

The radiocarbon age given overleaf is calibrated to the calendar timescale using the Oxford Radiocarbon Accelerator Unit calibration program OxCal 4.\*

The above date ranges have been calibrated using the IntCal13 atmospheric calibration curve†

Please contact the laboratory if you wish to discuss this further.

\* Bronk Ramsey (2009) *Radiocarbon* 51(1) pp.337-60

† Reimer et al. (2013) *Radiocarbon* 55(4) pp.1869-87

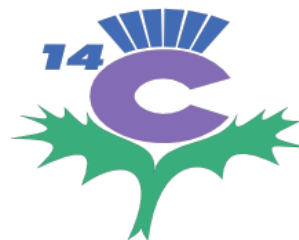

*RADIOCARBON DATING CERTIFICATE*

20 February 2019

**Laboratory Code** SUERC-84646 (GU50189)  
**Submitter** Paolo Forlin  
University of Durham  
Department of Archaeology  
South Road  
DH1 3LE  
Durham  
**Site Reference** GR-EC18  
**Context Reference** 210  
**Sample Reference** C14-03  
**Material** Charred plant remain : Hordeum sp.  
 **$\delta^{13}\text{C}$  relative to VPDB** -23.9 ‰  
**Radiocarbon Age BP** 816  $\pm$  34

**N.B.** The above  $^{14}\text{C}$  age is quoted in conventional years BP (before 1950 AD) and requires calibration to the calendar timescale. The error, expressed at the one sigma level of confidence, includes components from the counting statistics on the sample, modern reference standard and blank and the random machine error.

Samples with a SUERC coding are measured at the Scottish Universities Environmental Research Centre AMS Laboratory and should be quoted as such in any reports within the scientific literature. The laboratory GU coding should also be given in parentheses after the SUERC code.

Detailed descriptions of the methods employed by the SUERC Radiocarbon Laboratory can be found in Dunbar et al. (2016) *Radiocarbon* 58(1) pp.9-23.

For any queries relating to this certificate, the laboratory can be contacted at [suerc-c14lab@glasgow.ac.uk](mailto:suerc-c14lab@glasgow.ac.uk).

Conventional age and calibration age ranges calculated by :



Checked and signed off by :



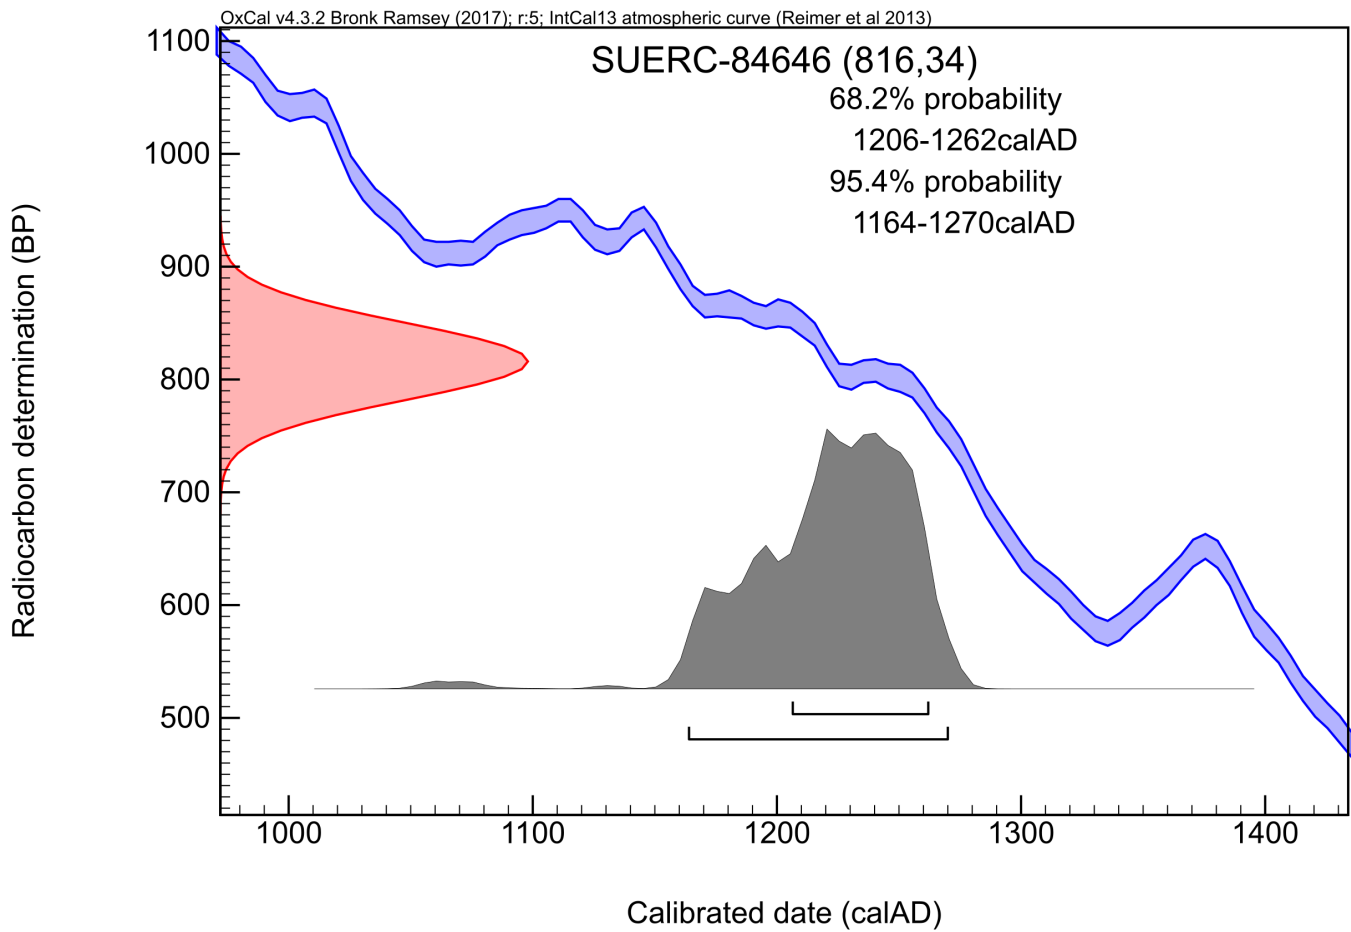

The radiocarbon age given overleaf is calibrated to the calendar timescale using the Oxford Radiocarbon Accelerator Unit calibration program OxCal 4.\*

The above date ranges have been calibrated using the IntCal13 atmospheric calibration curve†

Please contact the laboratory if you wish to discuss this further.

\* Bronk Ramsey (2009) *Radiocarbon* 51(1) pp.337-60

† Reimer et al. (2013) *Radiocarbon* 55(4) pp.1869-87

*RADIOCARBON DATING CERTIFICATE*

20 February 2019

**Laboratory Code** SUERC-84647 (GU50190)

**Submitter** Paolo Forlin  
University of Durham  
Department of Archaeology  
South Road  
DH1 3LE  
Durham

**Site Reference** GR-EC18

**Context Reference** 210

**Sample Reference** C14-04

**Material** Charred plant remain : cf. *Hordeum* sp.

**$\delta^{13}\text{C}$  relative to VPDB** -25.3 ‰

**Radiocarbon Age BP** 811  $\pm$  34

**N.B.** The above  $^{14}\text{C}$  age is quoted in conventional years BP (before 1950 AD) and requires calibration to the calendar timescale. The error, expressed at the one sigma level of confidence, includes components from the counting statistics on the sample, modern reference standard and blank and the random machine error.

Samples with a SUERC coding are measured at the Scottish Universities Environmental Research Centre AMS Laboratory and should be quoted as such in any reports within the scientific literature. The laboratory GU coding should also be given in parentheses after the SUERC code.

Detailed descriptions of the methods employed by the SUERC Radiocarbon Laboratory can be found in Dunbar et al. (2016) *Radiocarbon* 58(1) pp.9-23.

For any queries relating to this certificate, the laboratory can be contacted at [suerc-c14lab@glasgow.ac.uk](mailto:suerc-c14lab@glasgow.ac.uk).

Conventional age and calibration age ranges calculated by :



Checked and signed off by :



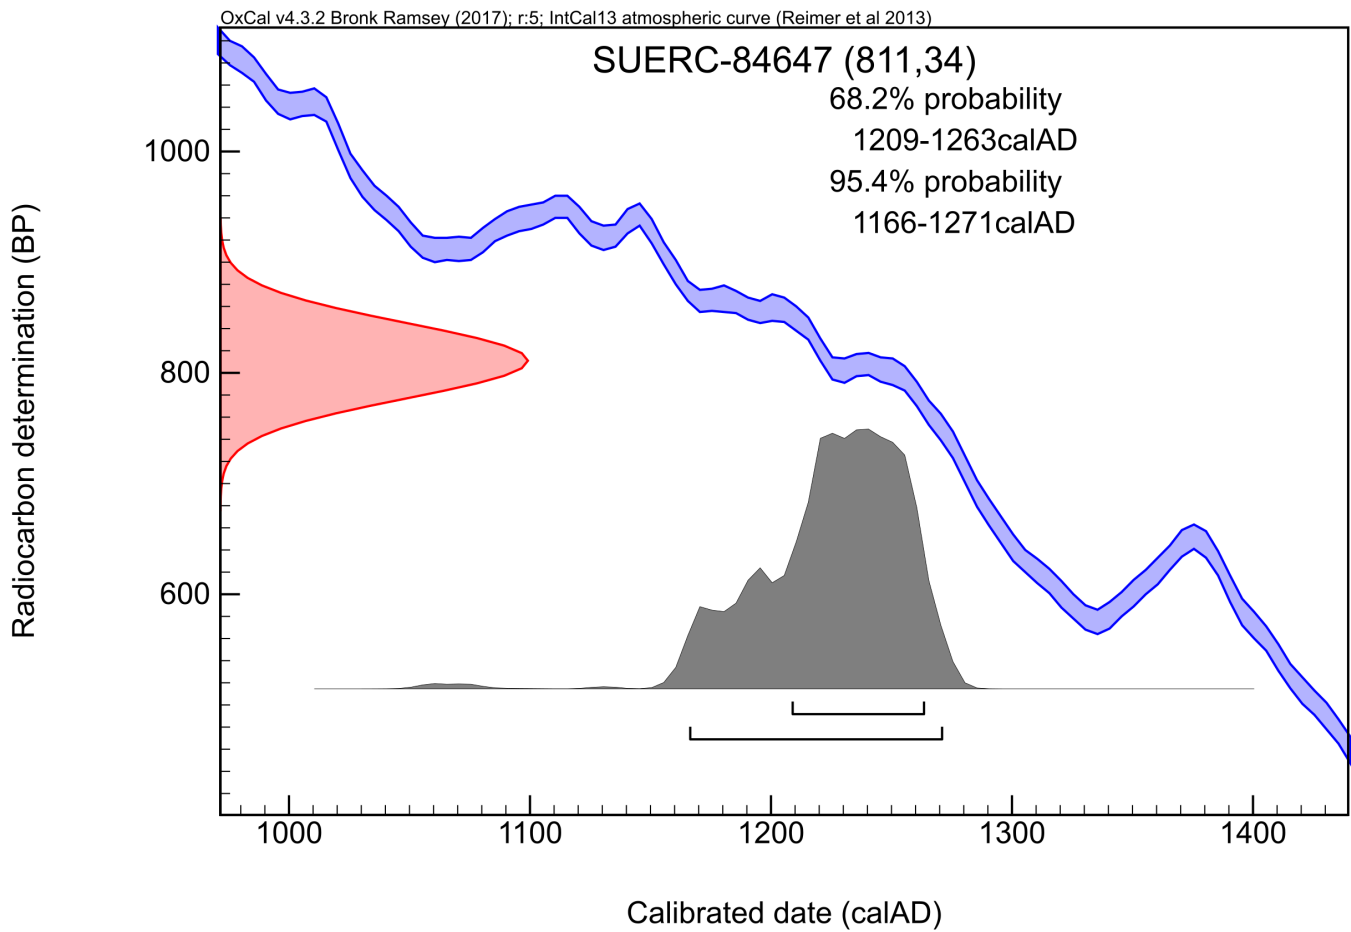

The radiocarbon age given overleaf is calibrated to the calendar timescale using the Oxford Radiocarbon Accelerator Unit calibration program OxCal 4.\*

The above date ranges have been calibrated using the IntCal13 atmospheric calibration curve†

Please contact the laboratory if you wish to discuss this further.

\* Bronk Ramsey (2009) *Radiocarbon* 51(1) pp.337-60

† Reimer et al. (2013) *Radiocarbon* 55(4) pp.1869-87



*RADIOCARBON DATING CERTIFICATE*

20 February 2019

**Laboratory Code** SUERC-84648 (GU50191)

**Submitter** Paolo Forlin  
University of Durham  
Department of Archaeology  
South Road  
DH1 3LE  
Durham

**Site Reference** GR-EC18

**Context Reference** 108

**Sample Reference** C14-05

**Material** Charred plant remain : *Olea europaea* L. (fragment)

**$\delta^{13}\text{C}$  relative to VPDB** -22.6 ‰

**Radiocarbon Age BP** 841  $\pm$  34

**N.B.** The above  $^{14}\text{C}$  age is quoted in conventional years BP (before 1950 AD) and requires calibration to the calendar timescale. The error, expressed at the one sigma level of confidence, includes components from the counting statistics on the sample, modern reference standard and blank and the random machine error.

Samples with a SUERC coding are measured at the Scottish Universities Environmental Research Centre AMS Laboratory and should be quoted as such in any reports within the scientific literature. The laboratory GU coding should also be given in parentheses after the SUERC code.

Detailed descriptions of the methods employed by the SUERC Radiocarbon Laboratory can be found in Dunbar et al. (2016) *Radiocarbon* 58(1) pp.9-23.

For any queries relating to this certificate, the laboratory can be contacted at [suerc-c14lab@glasgow.ac.uk](mailto:suerc-c14lab@glasgow.ac.uk).

Conventional age and calibration age ranges calculated by :



Checked and signed off by :



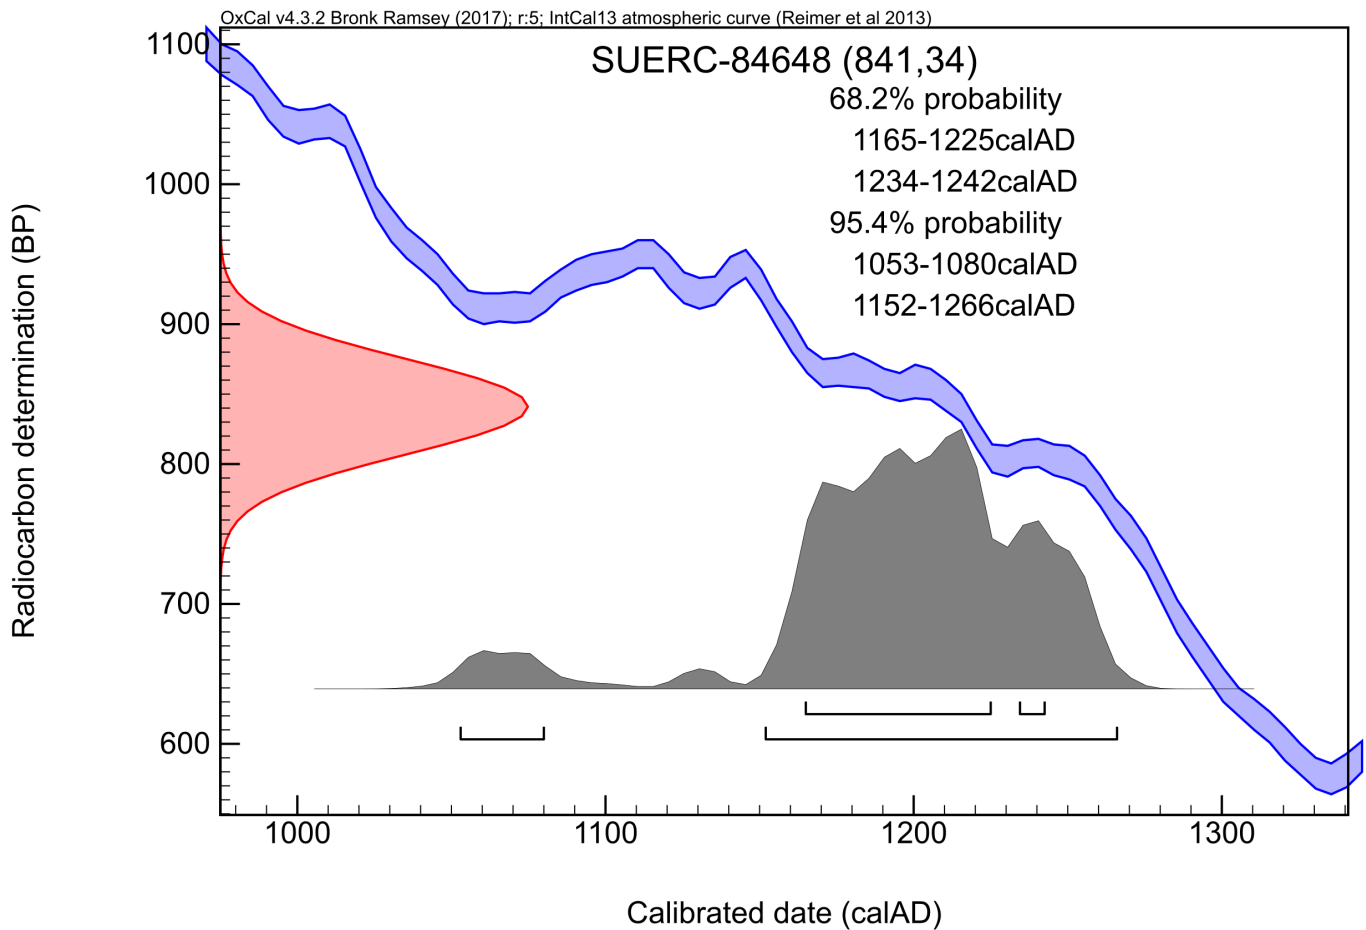

The radiocarbon age given overleaf is calibrated to the calendar timescale using the Oxford Radiocarbon Accelerator Unit calibration program OxCal 4.\*

The above date ranges have been calibrated using the IntCal13 atmospheric calibration curve†

Please contact the laboratory if you wish to discuss this further.

\* Bronk Ramsey (2009) *Radiocarbon* 51(1) pp.337-60

† Reimer et al. (2013) *Radiocarbon* 55(4) pp.1869-87



*RADIOCARBON DATING CERTIFICATE*

20 February 2019

**Laboratory Code** SUERC-84649 (GU50192)

**Submitter** Paolo Forlin  
University of Durham  
Department of Archaeology  
South Road  
DH1 3LE  
Durham

**Site Reference** GR-EC18

**Context Reference** 108

**Sample Reference** C14-06

**Material** Charred plant remain

**$\delta^{13}\text{C}$  relative to VPDB** -23.9 ‰

**Radiocarbon Age BP** 761  $\pm$  34

**N.B.** The above  $^{14}\text{C}$  age is quoted in conventional years BP (before 1950 AD) and requires calibration to the calendar timescale. The error, expressed at the one sigma level of confidence, includes components from the counting statistics on the sample, modern reference standard and blank and the random machine error.

Samples with a SUERC coding are measured at the Scottish Universities Environmental Research Centre AMS Laboratory and should be quoted as such in any reports within the scientific literature. The laboratory GU coding should also be given in parentheses after the SUERC code.

Detailed descriptions of the methods employed by the SUERC Radiocarbon Laboratory can be found in Dunbar et al. (2016) *Radiocarbon* 58(1) pp.9-23.

For any queries relating to this certificate, the laboratory can be contacted at [suerc-c14lab@glasgow.ac.uk](mailto:suerc-c14lab@glasgow.ac.uk).

Conventional age and calibration age ranges calculated by :



Checked and signed off by :



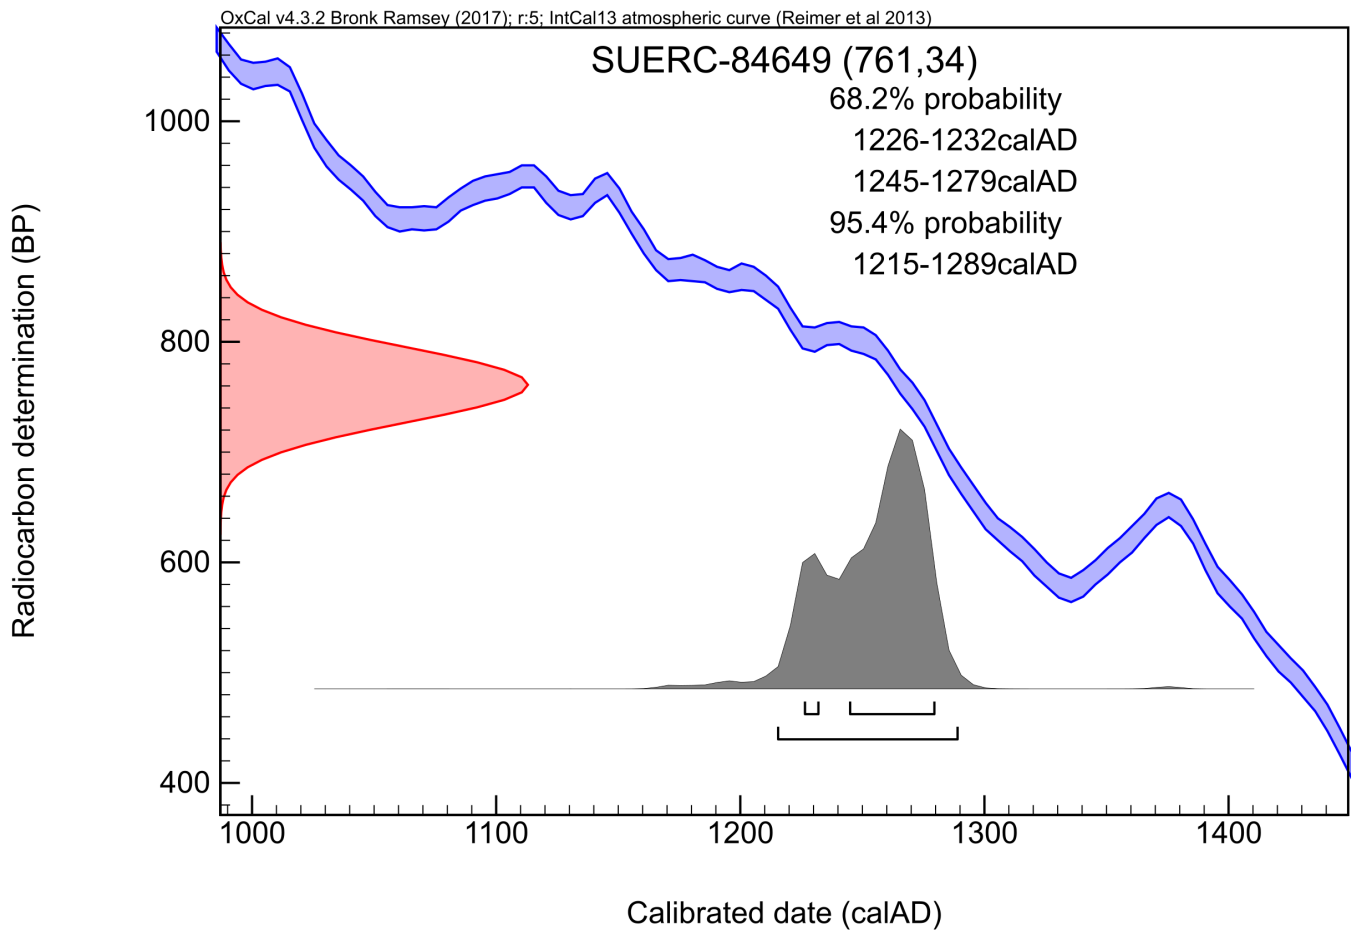

The radiocarbon age given overleaf is calibrated to the calendar timescale using the Oxford Radiocarbon Accelerator Unit calibration program OxCal 4.\*

The above date ranges have been calibrated using the IntCal13 atmospheric calibration curve†

Please contact the laboratory if you wish to discuss this further.

\* Bronk Ramsey (2009) *Radiocarbon* 51(1) pp.337-60

† Reimer et al. (2013) *Radiocarbon* 55(4) pp.1869-87

*RADIOCARBON DATING CERTIFICATE*

20 February 2019

**Laboratory Code** SUERC-84650 (GU50193)

**Submitter** Paolo Forlin  
University of Durham  
Department of Archaeology  
South Road  
DH1 3LE  
Durham

**Site Reference** GR-EC18

**Context Reference** 105

**Sample Reference** C14-07

**Material** Charred plant remain : Fruit fragment cf. *Vitis vinifera*

**$\delta^{13}\text{C}$  relative to VPDB** -23.8 ‰

**Radiocarbon Age BP** 784  $\pm$  34

**N.B.** The above  $^{14}\text{C}$  age is quoted in conventional years BP (before 1950 AD) and requires calibration to the calendar timescale. The error, expressed at the one sigma level of confidence, includes components from the counting statistics on the sample, modern reference standard and blank and the random machine error.

Samples with a SUERC coding are measured at the Scottish Universities Environmental Research Centre AMS Laboratory and should be quoted as such in any reports within the scientific literature. The laboratory GU coding should also be given in parentheses after the SUERC code.

Detailed descriptions of the methods employed by the SUERC Radiocarbon Laboratory can be found in Dunbar et al. (2016) *Radiocarbon* 58(1) pp.9-23.

For any queries relating to this certificate, the laboratory can be contacted at [suerc-c14lab@glasgow.ac.uk](mailto:suerc-c14lab@glasgow.ac.uk).

Conventional age and calibration age ranges calculated by :



Checked and signed off by :



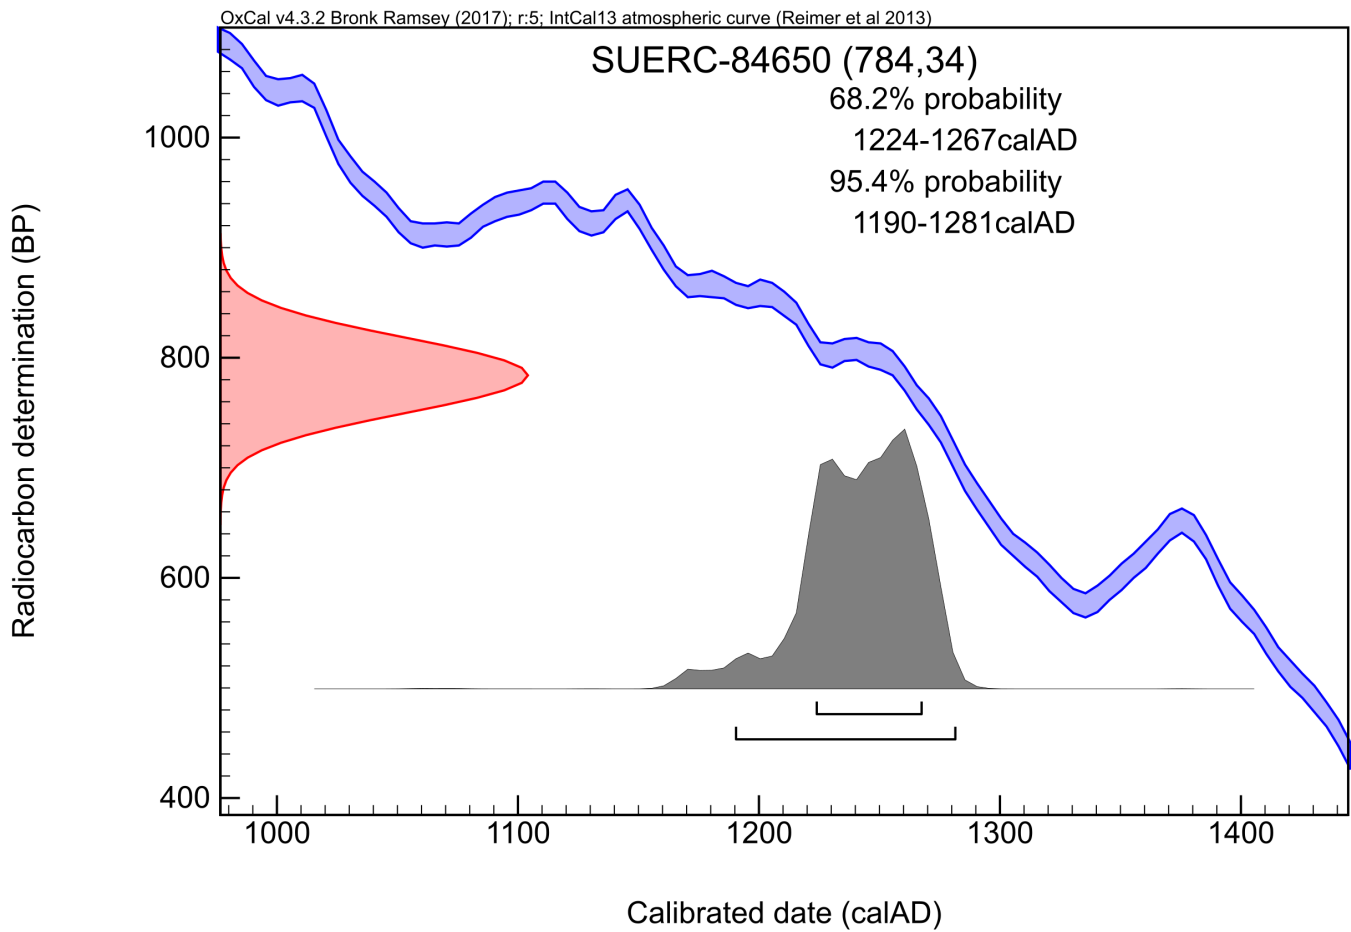

The radiocarbon age given overleaf is calibrated to the calendar timescale using the Oxford Radiocarbon Accelerator Unit calibration program OxCal 4.\*

The above date ranges have been calibrated using the IntCal13 atmospheric calibration curve†

Please contact the laboratory if you wish to discuss this further.

\* Bronk Ramsey (2009) *Radiocarbon* 51(1) pp.337-60

† Reimer et al. (2013) *Radiocarbon* 55(4) pp.1869-87



*RADIOCARBON DATING CERTIFICATE*

20 February 2019

**Laboratory Code** SUERC-84651 (GU50194)  
**Submitter** Paolo Forlin  
University of Durham  
Department of Archaeology  
South Road  
DH1 3LE  
Durham  
**Site Reference** GR-EC18  
**Context Reference** 3011  
**Sample Reference** C14-08  
**Material** Charcoal : Fabaceae (roundwood)  
 **$\delta^{13}\text{C}$  relative to VPDB** -24.5 ‰  
**Radiocarbon Age BP** 789  $\pm$  34

**N.B.** The above  $^{14}\text{C}$  age is quoted in conventional years BP (before 1950 AD) and requires calibration to the calendar timescale. The error, expressed at the one sigma level of confidence, includes components from the counting statistics on the sample, modern reference standard and blank and the random machine error.

Samples with a SUERC coding are measured at the Scottish Universities Environmental Research Centre AMS Laboratory and should be quoted as such in any reports within the scientific literature. The laboratory GU coding should also be given in parentheses after the SUERC code.

Detailed descriptions of the methods employed by the SUERC Radiocarbon Laboratory can be found in Dunbar et al. (2016) *Radiocarbon* 58(1) pp.9-23.

For any queries relating to this certificate, the laboratory can be contacted at [suerc-c14lab@glasgow.ac.uk](mailto:suerc-c14lab@glasgow.ac.uk).

Conventional age and calibration age ranges calculated by :



Checked and signed off by :



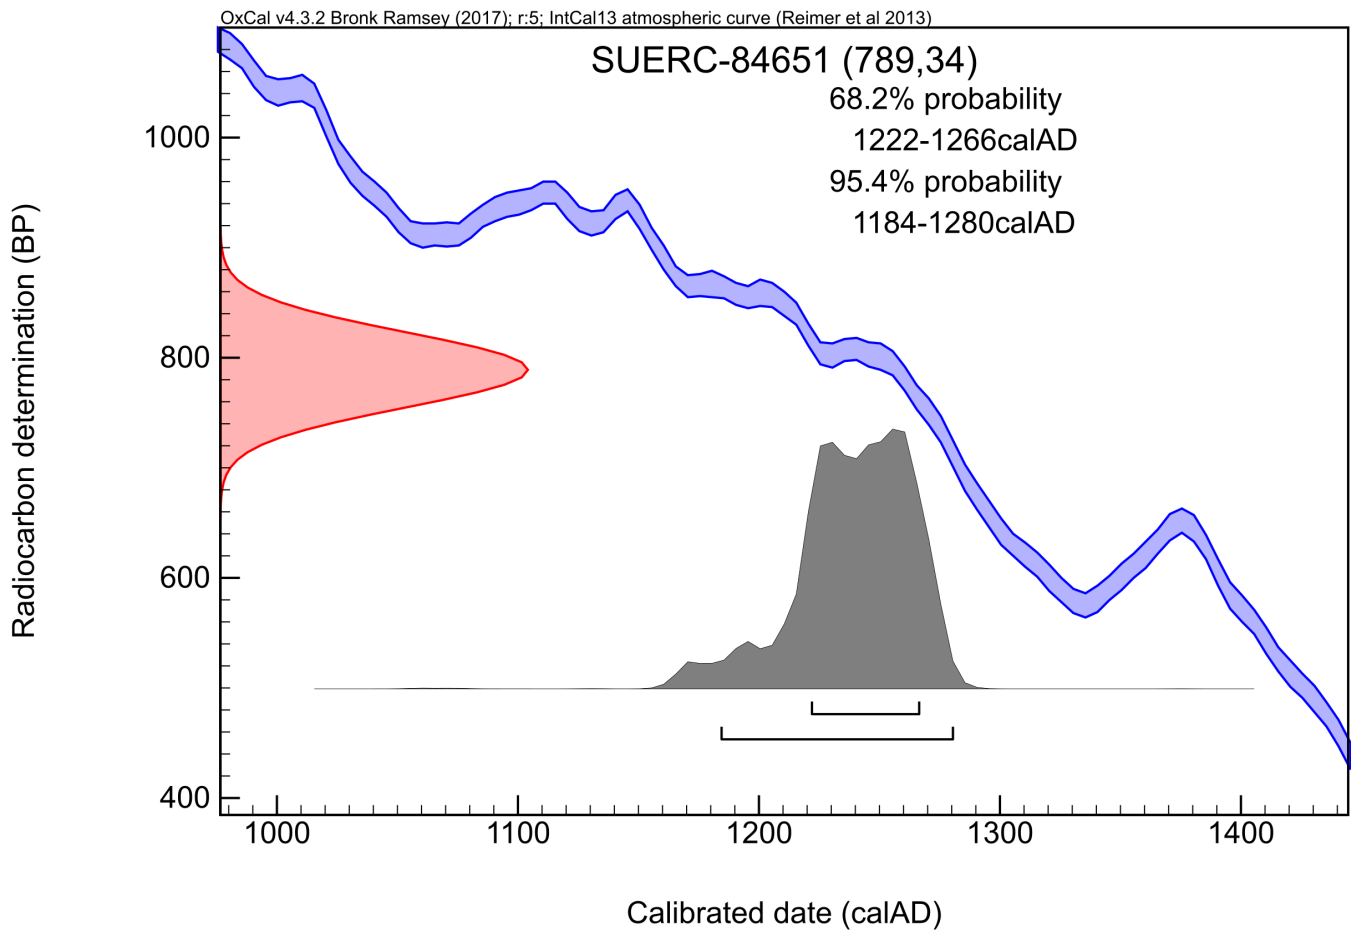

The radiocarbon age given overleaf is calibrated to the calendar timescale using the Oxford Radiocarbon Accelerator Unit calibration program OxCal 4.\*

The above date ranges have been calibrated using the IntCal13 atmospheric calibration curve†

Please contact the laboratory if you wish to discuss this further.

\* Bronk Ramsey (2009) *Radiocarbon* 51(1) pp.337-60

† Reimer et al. (2013) *Radiocarbon* 55(4) pp.1869-87
