# Supplementary material for: Recovering a lost seismic disaster. The destruction of El Castillejo and the discovery of the earliest historic earthquake affecting the Granada region (Spain)
Source: PubMed Central journal article supplement (PMC11023601; doi:10.1371/journal.pone.0300549), 2024-04-17

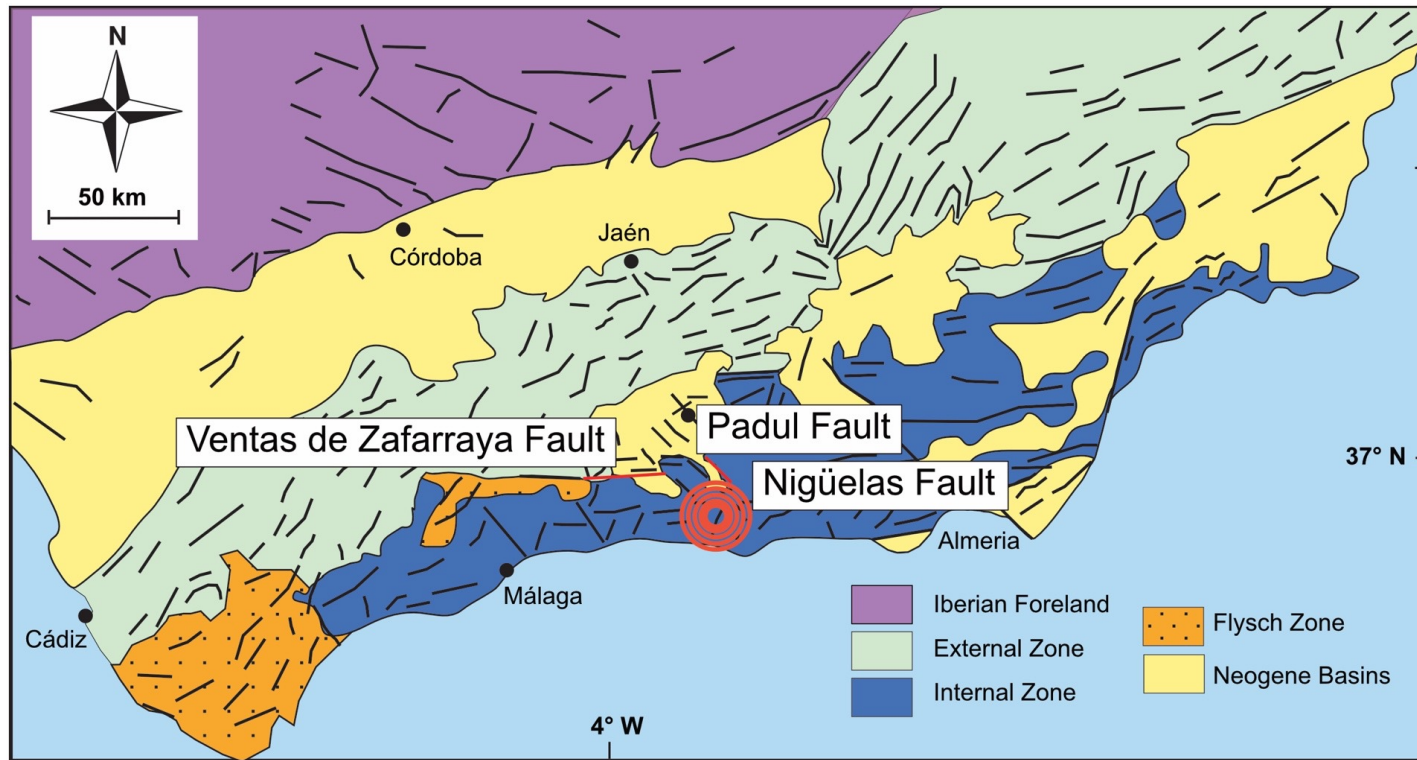

Seismogenic Faults in the study area, concentric red circles – El Castillejo

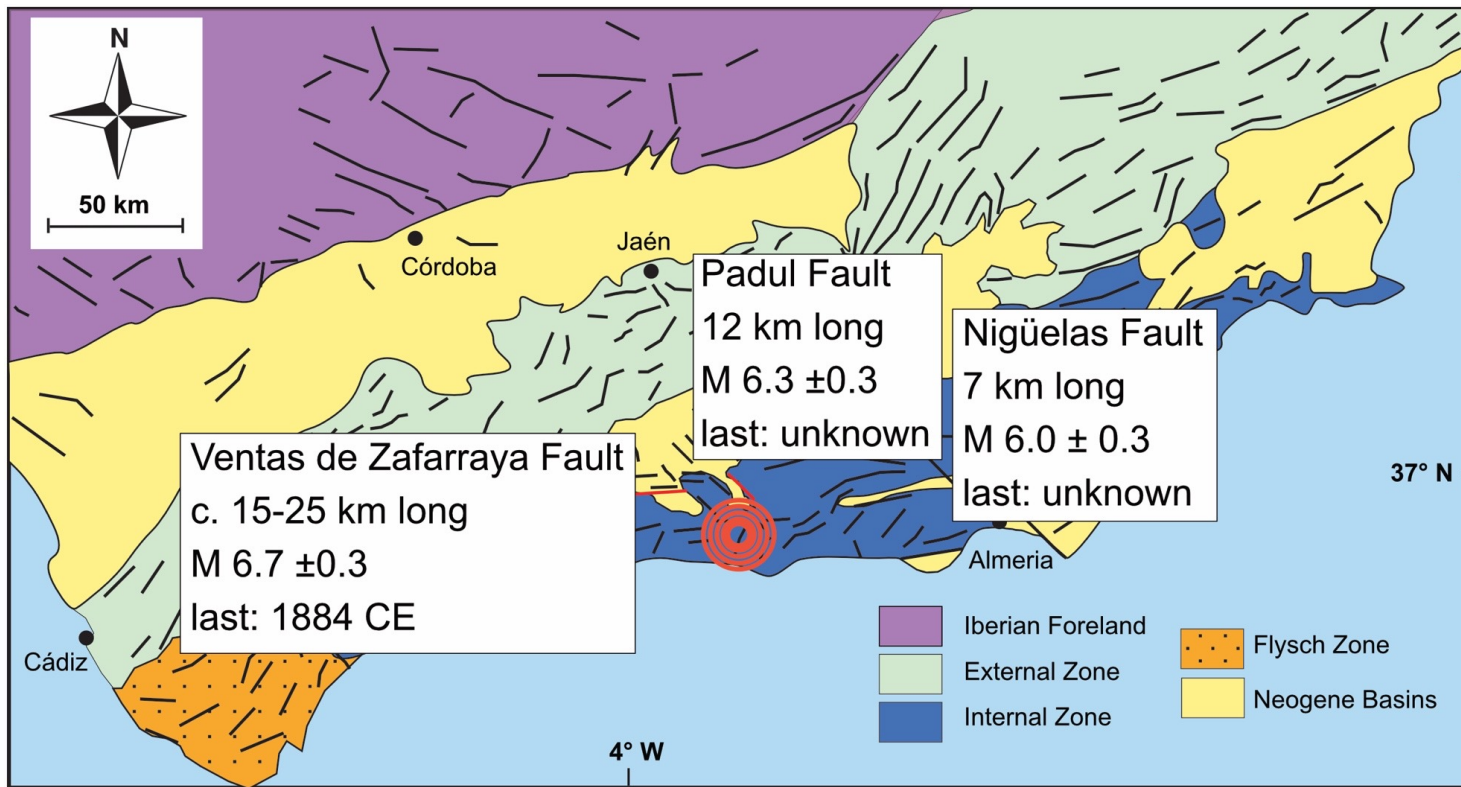

Seismogenic Faults in the study area, concentric red circles – El Castillejo-  
 Length, possible M (capable for), and last eq

# Scenario: 1884; Earthquake in Ventas de Zaffaraya Fault magnitude: 6.7, depth: 10 km, maximum intensity: 8.7

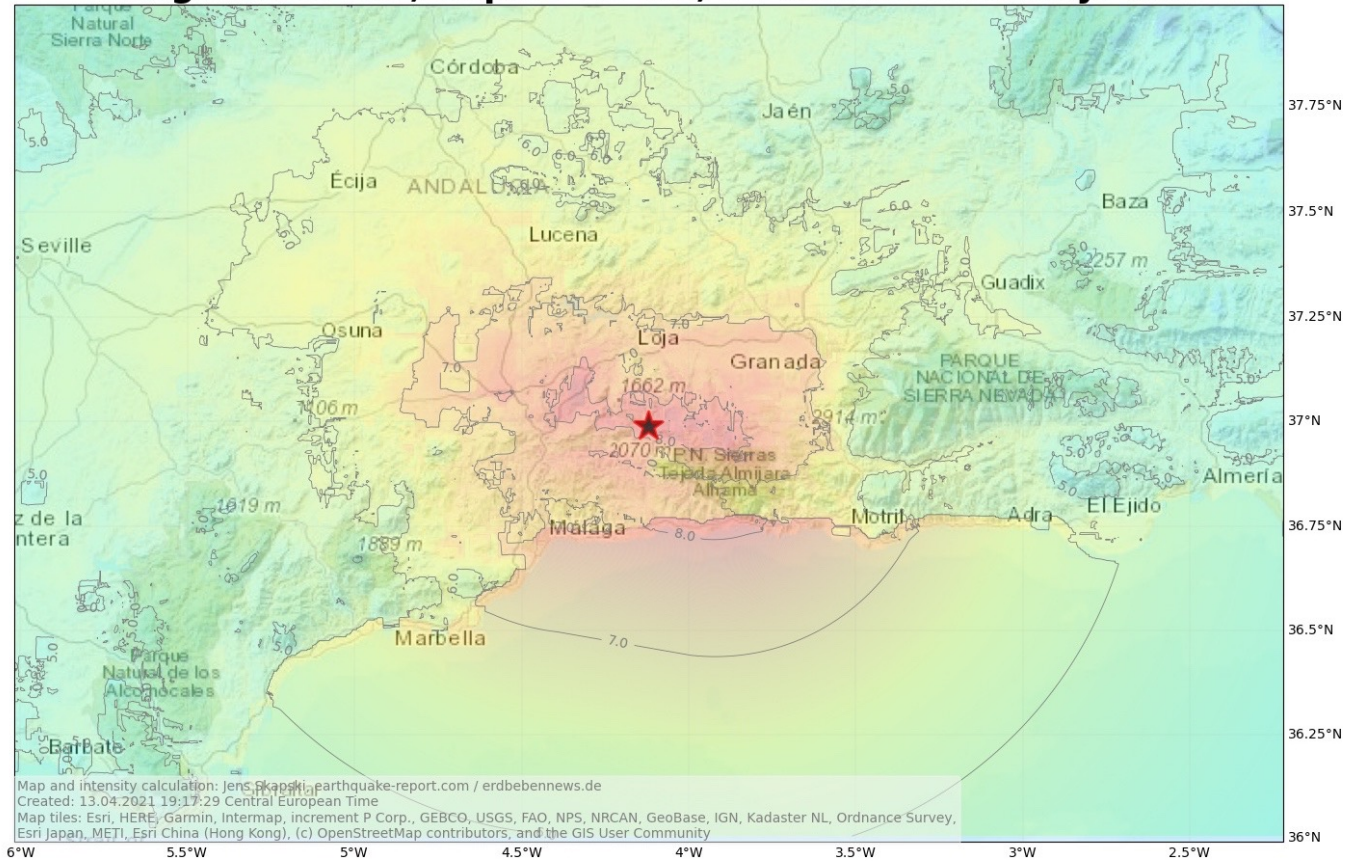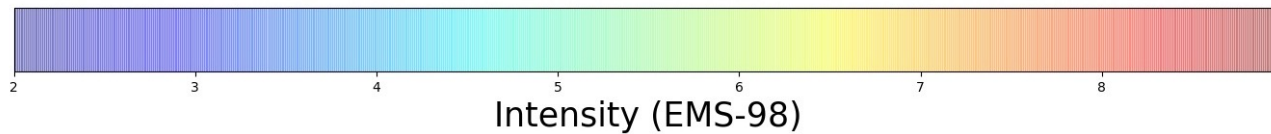

# Scenario: 3000 BP; Earthquake in Niguelas Fault magnitude: 6.0, depth: 6 km, maximum intensity: 8.1

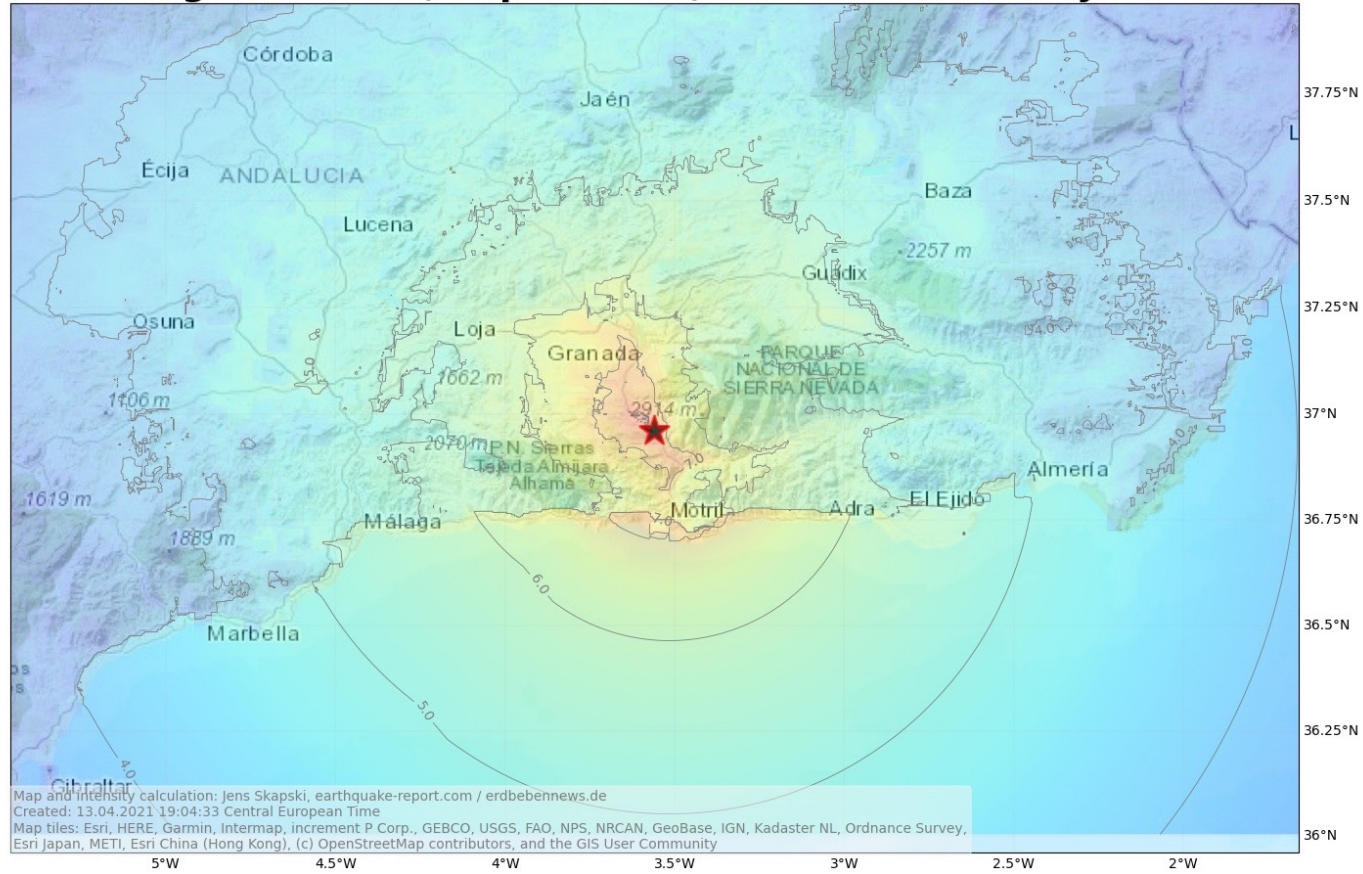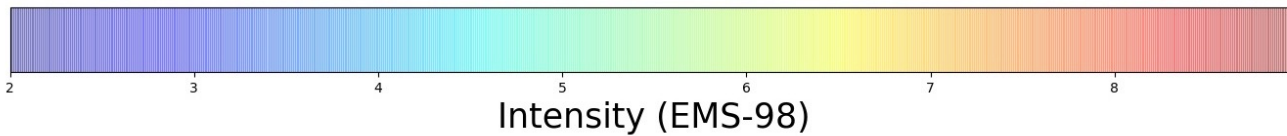

**Scenario: 3000 BP; Earthquake in Padul Fault  
magnitude: 6.3, depth: 8 km, maximum intensity: 8.5**

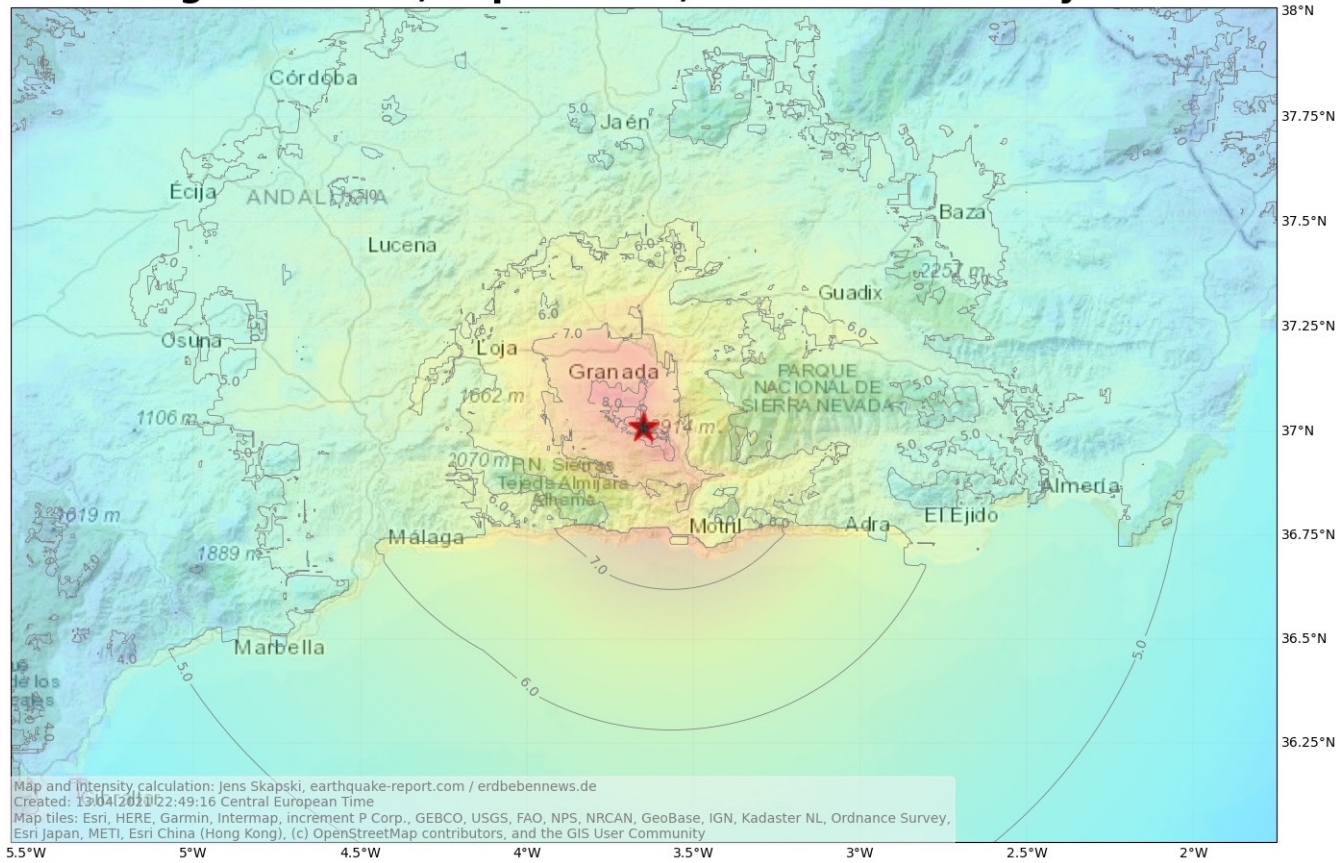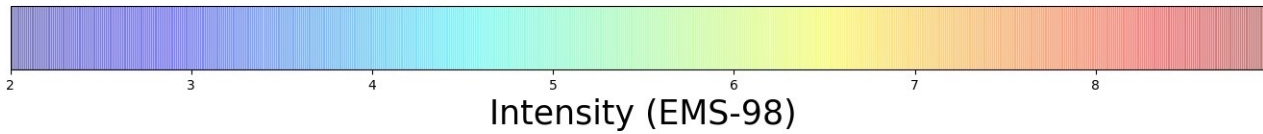

**Scenario: 1240; Earthquake in El Castillejo  
magnitude: 6.0, depth: 10 km, maximum intensity: 8.6**

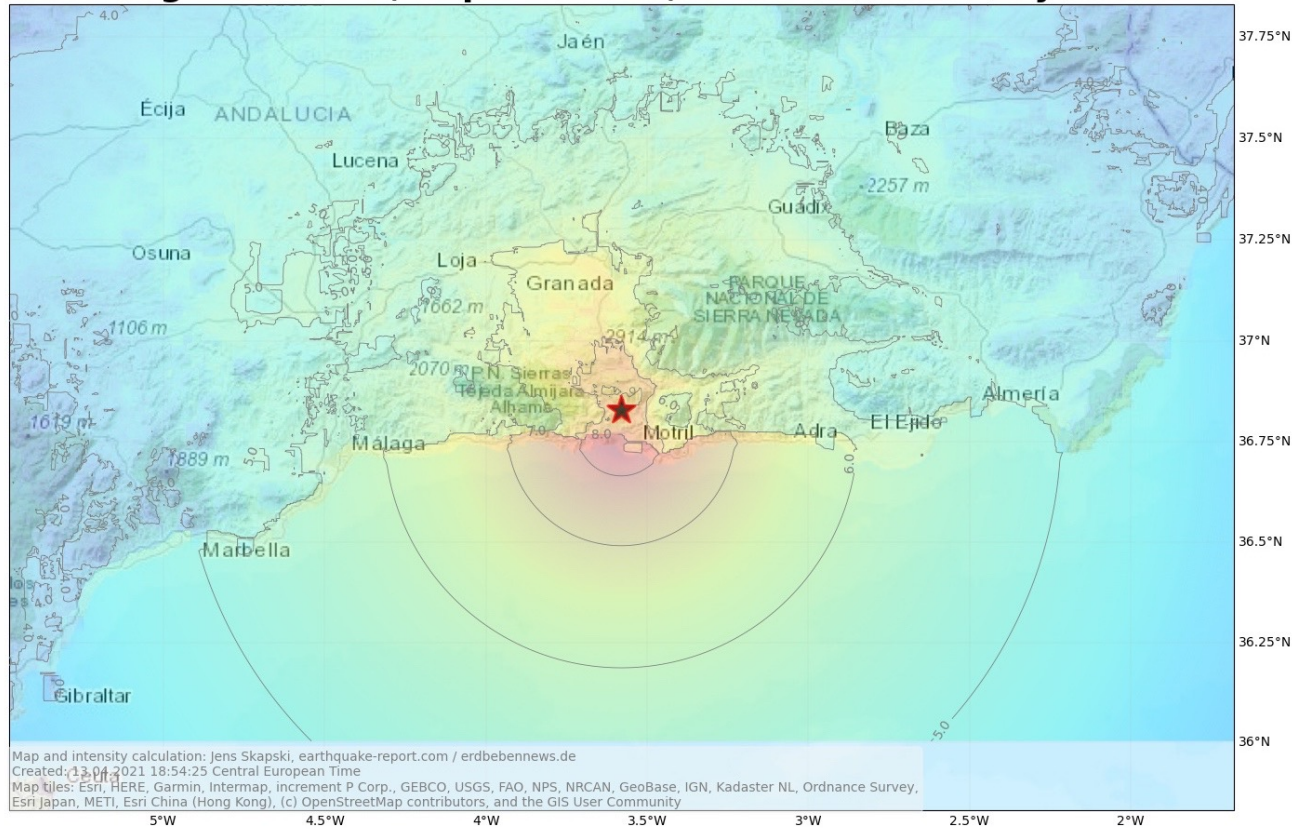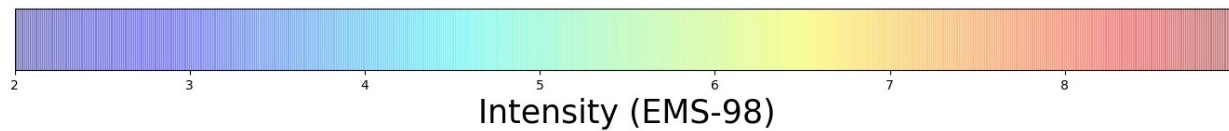

Supplement: pone.0300549.s004.pdf [file pone.0300549.s004.pdf]
